# Supplementary material for: Impact of infrared radiation on UVB-induced skin tumourigenesis in wild type C57BL/6 mice
Source: Royal Society of Chemistry journal article supplement (doi:10.1039/c8pp00118a), 2018-10-08
Supplement: c8pp00118a2.pdf [file c8pp00118a2.pdf]

## Supplementary Figure and Table legends

### Impact of Infrared Radiation on UVB-induced Skin Tumourigenesis in Wild Type C57BL/6 Mice

Susanne Kimeswenger<sup>a</sup>, Barbara Sterniczky<sup>a</sup>, Anne Kramer<sup>b</sup>, Katharina Tillmann<sup>b</sup>, Jutta Gamper<sup>c</sup>, Dagmar Foedinger<sup>a</sup>, Peter Petzelbauer<sup>a</sup>, Christian Jantschitsch<sup>a</sup>

<sup>a</sup> Department of Dermatology; Medical University of Vienna, Austria; Waehringer Guertel 18–20; 1090 Vienna; AUSTRIA

<sup>b</sup> Centre for Biomedical Research; Medical University of Vienna, Austria; Waehringer Guertel 18–20; 1090 Vienna; AUSTRIA

<sup>c</sup> Centre for Medical Statistics, Informatics, and Intelligent Systems; Medical University of Vienna, Austria; Waehringer Guertel 18–20; 1090 Vienna; AUSTRIA

### Supplementary Figure 1

(A) Kaplan-Meier-Curve of lesion-free survival of mice exposed to UVB (blue), IRA+UVB (yellow) and IRA (red), and unexposed controls (green); UVB vs. IRA+UVB:  $p=0.6741$ . Inset represents the average number + SD of lesions per mouse that developed in the two UVB-exposed groups;  $p=0.6385$ . (B) Expected cumulative number of lesions developing in mice exposed to UVB (blue) and IRA+UVB (yellow) as estimated by the Nelson-Aalen estimator;  $p=0.4400$ .

### Supplementary Figure 2

Tumour occurrences for each mouse (A) exposed to IRA+UVB and (B) exposed to UVB. Non-epithelial malignant tumours are marked with an x, other types of tumours are marked with black boxes.

### Supplementary Figure 3

Representative H&E images of benign lesions. (A,D) Representative pictures of a fibroma. (B,E) Representative pictures of a papilloma. (C,F) Representative pictures of a cyst. Scale bars represent 1,000  $\mu\text{m}$  for overview screen (A-C) and 100  $\mu\text{m}$  for detail screen (D-F).

### Supplementary Figure 4

Differentiation states of SCC. (A,D) H&E staining of a representative well differentiated SCC, showing horn pearls and hornification. (B,E) H&E staining of a representative moderately differentiated SCC. (C,F) H&E staining of a representative poorly differentiated SCC, cells lose epithelial phenotype and become spindle-shaped. Scale bars represent 1,000  $\mu\text{m}$  for overview screen (A-C) and 100  $\mu\text{m}$  for detail screen (D-F).

**Supplementary Figure 5**

(A) Kaplan-Meier-Curve of proliferative epithelial lesion-free survival of mice exposed to UVB and IRA+UVB. Solid, pink line represents female animals, dashed, turquoise line represents male animals; 0.1007. (B) Kaplan-Meier-Curve of proliferative epithelial malignant lesion-free (=SCC-free) survival of mice exposed to UVB and IRA+UVB. Solid, pink line represents female animals, dashed, turquoise line represents male animals;  $p=0.2934$ .

**Supplementary Table 1**

Criteria for assessment of physical and mental health of C57BL/6 N mice.
