# Supplementary material for: Impact of infrared radiation on UVB-induced skin tumourigenesis in wild type C57BL/6 mice
Source: Royal Society of Chemistry journal article supplement (doi:10.1039/c8pp00118a), 2018-10-08
Supplement: c8pp00118a3.pdf [file c8pp00118a3.pdf]

## Supplementary Table 1

### Impact of Infrared Radiation on UVB-induced Skin Tumourigenesis in Wild Type C57BL/6 Mice

Susanne Kimeswenger<sup>a</sup>, Barbara Sterniczky<sup>a</sup>, Anne Kramer<sup>b</sup>, Katharina Tillmann<sup>b</sup>, Jutta Gamper<sup>c</sup>, Dagmar Foedinger<sup>a</sup>, Peter Petzelbauer<sup>a</sup>, Christian Jantschitsch<sup>a</sup>

<sup>a</sup> Department of Dermatology; Medical University of Vienna, Austria; Waehringer Guertel 18–20; 1090 Vienna; AUSTRIA

<sup>b</sup> Centre for Biomedical Research; Medical University of Vienna, Austria; Waehringer Guertel 18–20; 1090 Vienna; AUSTRIA

<sup>c</sup> Centre for Medical Statistics, Informatics, and Intelligent Systems; Medical University of Vienna, Austria; Waehringer Guertel 18–20; 1090 Vienna; AUSTRIA

**Supplementary Table 1:** Criteria for assessment of physical and mental health of C57BL/6 N mice.

| Observation                                                                                                                                    | Point rationing scheme |
|------------------------------------------------------------------------------------------------------------------------------------------------|------------------------|
| <b>I Spontaneous behaviour</b>                                                                                                                 |                        |
| Normal behaviour (sleeping, reaction to stimuli, curiousness, social contacts)                                                                 | 0                      |
| Unusual behaviour, limited movement or hyperkinetic behaviour                                                                                  | 5                      |
| Self-isolation, pronounced hyperkinetic behaviour or behavioural stereotypes; loss of fear of contact by humans, non-stopping cleaning; ataxia | 10                     |
| Self-amputation, lethargy                                                                                                                      | 20                     |
| <b>II Clinical evidence</b>                                                                                                                    |                        |
| Respiration, pulse and skin elasticity without pathological findings                                                                           | 0                      |
| Respiration and pulse obviously enhanced/impaired; wound up abdomen, dehydration (skin elasticity is lost)                                     | 10                     |
| <b>III Skin lesions</b>                                                                                                                        |                        |
| Normal skin                                                                                                                                    | 0                      |
| Erythema, hairless spots                                                                                                                       | 5                      |
| Erosion, flat ulcers > cm <sup>2</sup> or ulcers reaching beyond the dermis > 1 cm <sup>2</sup>                                                | 10                     |
| Erosion, flat ulcers > 2 cm <sup>2</sup> or ulcers reaching beyond the dermis > 1 cm <sup>2</sup> persisting for at least eight days           | 20                     |
| <b>Rating and measures</b>                                                                                                                     |                        |
| Rating 0 = no stress                                                                                                                           | 0                      |
| Rating 1 = intermediate stress, if necessary veterinarian's advice                                                                             | 5-15                   |
| Rating 2 = high stress, preliminary determination of the experiments (sacrifice of the animal using cervical dislocation)                      | 20 or higher           |
