# Supplementary figures and images for: Impact of infrared radiation on UVB-induced skin tumourigenesis in wild type C57BL/6 mice
Source: Royal Society of Chemistry journal article supplement (doi:10.1039/c8pp00118a), 2018-10-08

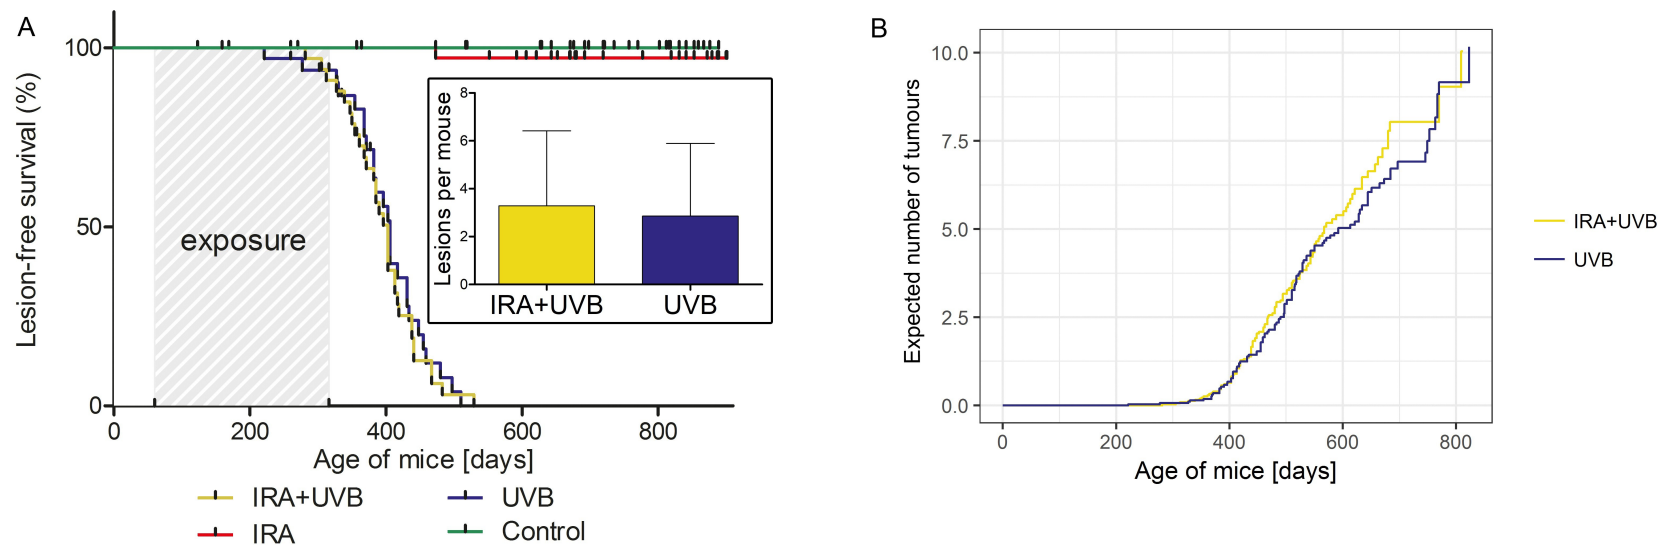

Supplementary Figure 1

Supplement: c8pp00118a1.pdf [file c8pp00118a1.pdf]

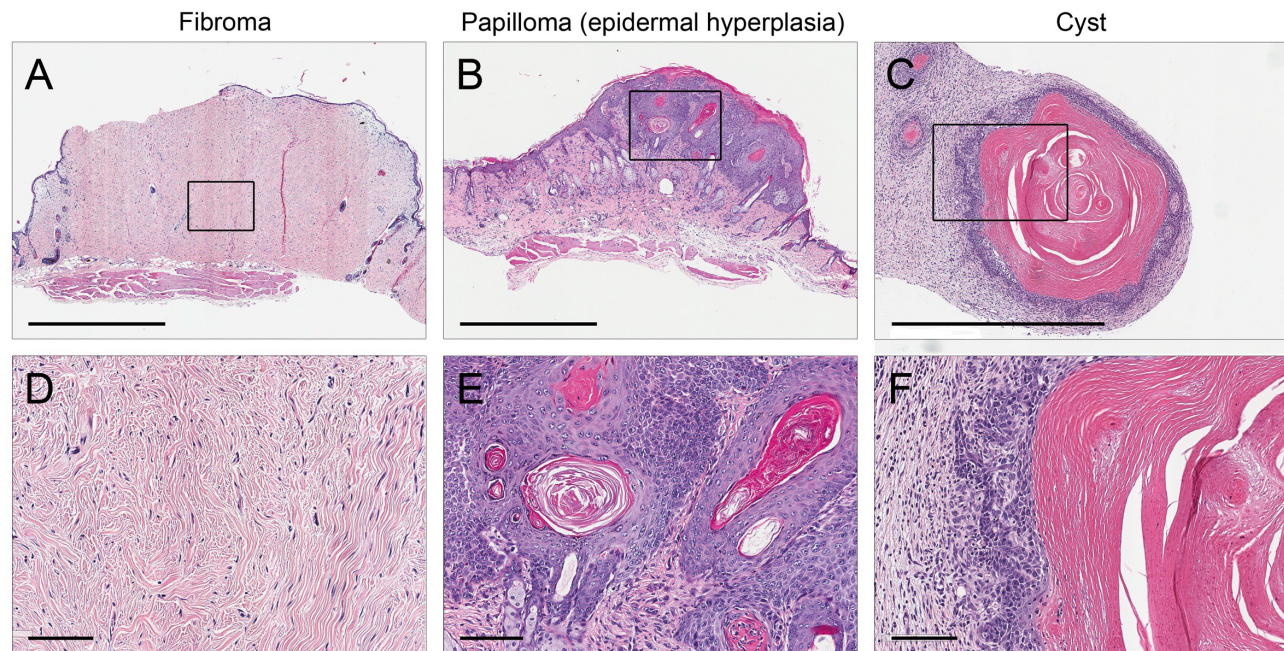

Supplementary Figure 3

Supplement: c8pp00118a5.pdf [file c8pp00118a5.pdf]

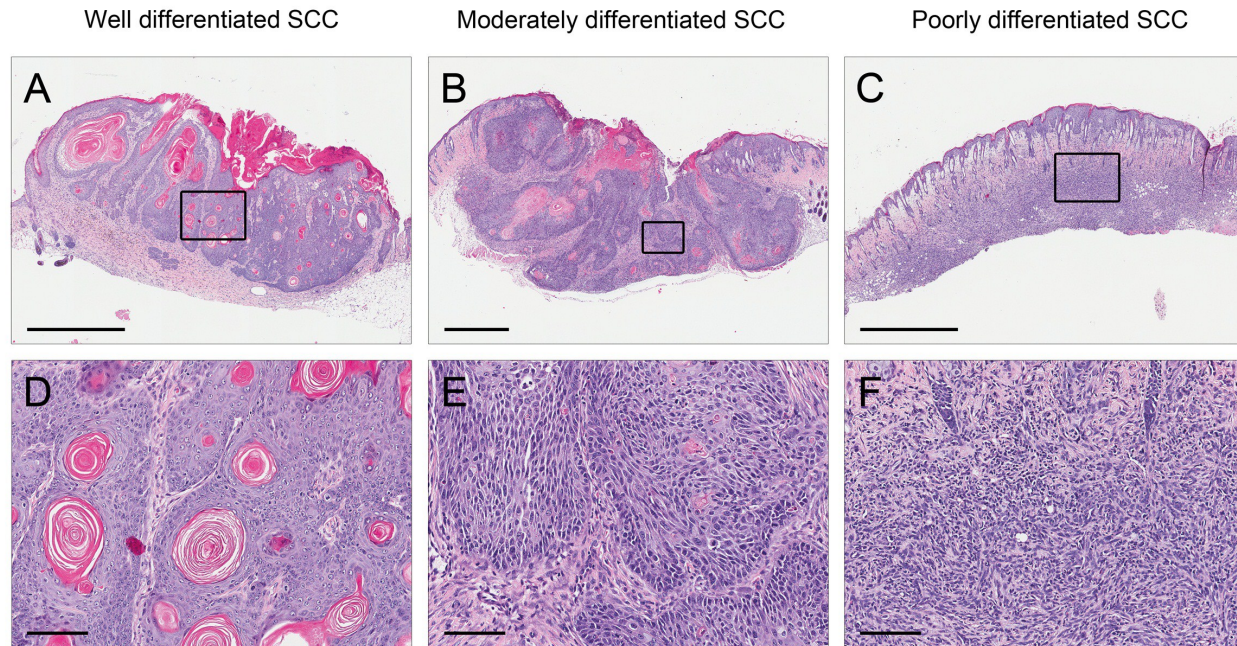

Supplement: c8pp00118a6.pdf [file c8pp00118a6.pdf]

A

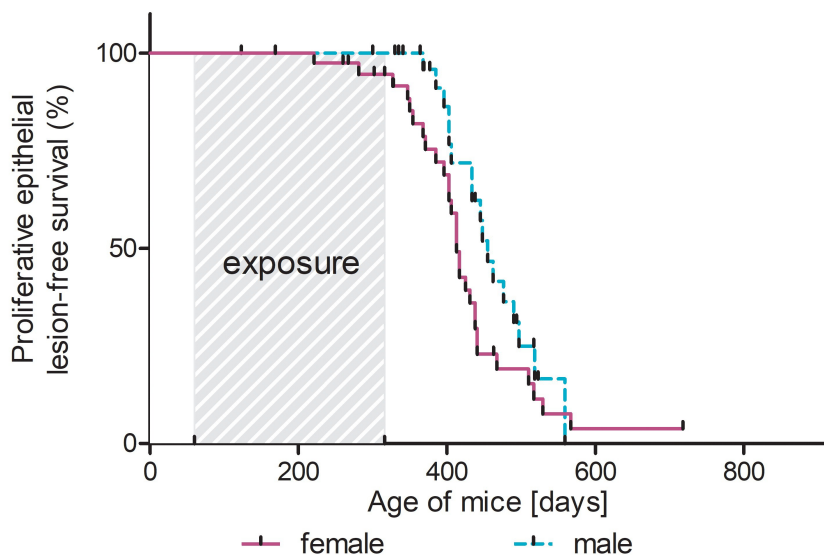

B

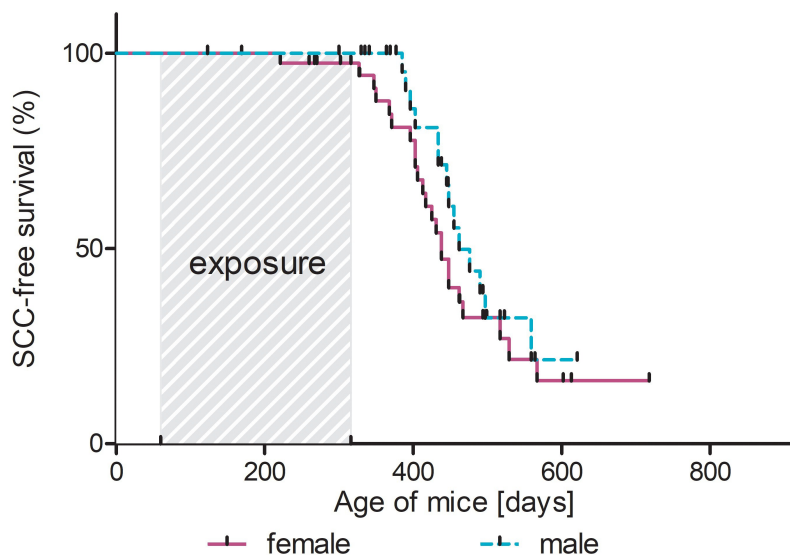

Supplementary Figure 5

Supplement: c8pp00118a7.pdf [file c8pp00118a7.pdf]
